# Supplementary material
Source: HighWire-hosted journal article supplement (https://jech.bmj.com/content/73/10/954)
Supplement: inline-supplementary-material-1 [file inline-supplementary-material-1.pdf]

## Supplementary online materials

### Appendix 1. Measuring sexual orientation in samples of adolescents

Sexual attraction captures individuals' "*desire to have sexual relations or to be in a primary loving, sexual relationship with one or both sexes*", and is considered a crucial component of sexual orientation (Savin-Williams, 2006).

When surveying adolescents in the age range in our study (14/15 years), the literature indicates that—if only one domain can be included—it is best practice to ask about their attractions rather than the other domains of sexual orientation (i.e., identity and behaviour). This is because (i) sexual-minority identity development generally occurs at older ages, and typically follows from the development of sexual attractions (Katz-Wise et al., 2017; Savin-Williams & Cohen, 2015), and (ii) measures based on sexual behaviour are less relevant, as not all 14-/15-year-olds are sexually active (Saewyc et al., 2004).

Further, attraction-based measures have also been explicitly recognised as the optimal choice for surveys of adolescents in methodological literature (Badgett, 2009; Durso & Gates, 2013; Wolff et al., 2017). For example, cognitive interviewing has shown that attraction-based measures are the most consistently understood by adolescents, and therefore the easiest for them to answer accurately (Austin et al., 2007). Besides, adolescents themselves see 'attraction' as the central dimension of their sexual orientation (Friedman et al., 2004).

For these reasons, attraction-based measures of adolescent sexual orientation are used in key surveys for this age group (e.g., the UK's *Millennium Cohort Study*, the US *National Longitudinal Study of Adolescent to Adult Health*, or the *Avon Longitudinal Study of Parents and Children*) and many recent and/or influential studies in the field rely on them (Irish et al., 2019; Needham, 2012; Xu, Norton, & Rahman, 2019).

### References for Appendix 1

- Austin, S. B., Conron, K. J., Patel, A., & Freedner, N. (2007). Making sense of sexual orientation measures: findings from a cognitive processing study with adolescents on health survey questions. *Journal of LGBT Health Research*, 3(1), 55-65.
- Badgett, M. V. L. (2009). Best practices for asking questions about sexual orientation on surveys. Retrieved from: <http://escholarship.org/uc/item/706057d5#>;

- Durso, L. E., & Gates, G. (2013). Best practices: collecting and analyzing data on sexual minorities. In A. K. Baumle (Ed.), *International Handbook on the Demography of Sexuality*. Dordrecht: Springer.
- Friedman, M. S. M. S., Silvestre, A. J., Gold, M. A., Markovic, N., Savin-Williams, R. C., Huggins, J., & Sell, R. L. (2004). Adolescents define sexual orientation and suggest ways to measure it. *Journal of Adolescence*, 27(3), 303-317.
- Irish, M., Solmi, F., Mars, B., King, M., Lewis, G., Pearson, R. M., ... Lewis, G. (2019). Depression and self-harm from adolescence to young adulthood in sexual minorities compared with heterosexuals in the UK: a population-based cohort study. *The Lancet Child & Adolescent Health*, 3(2), 91-98.
- Katz-Wise, S. L., Rosario, M., Calzo, J. P., Scherer, E. A., Sarda, V., & Austin, S. B. (2017). Endorsement and timing of sexual orientation developmental milestones among sexual minority young adults in the Growing Up Today Study. *The Journal of Sex Research*, 54(2), 172-185.
- Needham, B. L. (2012). Sexual attraction and trajectories of mental health and substance use during the transition from adolescence to adulthood. *Journal of Youth and Adolescence*, 41(2), 179-190.
- Savin-Williams, R. C. (2006). Who's gay? Does it matter? *Current Directions in Psychological Science*, 15(1), 40-44.
- Savin-Williams, R. C., & Cohen, K. M. (2015). Developmental trajectories and milestones of lesbian, gay, and bisexual young people. *International Review of Psychiatry*, 27(5), 357-366.
- Saewyc, E. M., Bauer, G. R., Skay, C. L., Bearinger, L. H., Resnick, M. D., Reis, E., & Murphy, A. (2004). Measuring sexual orientation in adolescent health surveys: evaluation of eight school-based surveys. *Journal of Adolescent Health*, 35(4), 345.e341-345.e315.
- Wolff, M., Wells, B., Ventura-Dipersia, C., Renson, A., & Grov, C. (2017). Measuring sexual orientation: A review and critique of US data collection efforts and implications for health policy. *The Journal of Sex Research*, 54, 507-531.
- Xu, Y., Norton, S., & Rahman, Q. (2019). Early life conditions and adolescent sexual orientation: A prospective birth cohort study. *Developmental Psychology*, 55(6), 1226-1243.

## Appendix 2. Supplementary Tables

Supplementary Table 1. Ordinary least squares regression models with missing sexual attraction group, full sets of estimates

| <i>Models 1-10</i>                               | SDQ<br>total<br>(R)     | SDQ<br>peer<br>(R)      | SDQ<br>conduct<br>(R)   | SDQ<br>emotional<br>(R) | SDQ<br>hyperactivity<br>(R) | SDQ<br>pro-social       | PED<br>total            | PED<br>physical         | PED<br>emotional        | PED<br>social           |
|--------------------------------------------------|-------------------------|-------------------------|-------------------------|-------------------------|-----------------------------|-------------------------|-------------------------|-------------------------|-------------------------|-------------------------|
| <i>Sexual attraction<br/>(ref. heterosexual)</i> |                         |                         |                         |                         |                             |                         |                         |                         |                         |                         |
| LGBQ                                             | -0.68*<br>(-0.82,-0.55) | -0.68*<br>(-0.82,-0.55) | -0.34*<br>(-0.47,-0.20) | -0.62*<br>(-0.74,-0.49) | -0.39*<br>(-0.52,-0.25)     | -0.13*<br>(-0.26,-0.00) | -0.33*<br>(-0.46,-0.20) | -0.18*<br>(-0.31,-0.04) | -0.42*<br>(-0.55,-0.29) | -0.31*<br>(-0.44,-0.17) |
| No attraction                                    | -0.01<br>(-0.17,0.16)   | -0.49*<br>(-0.66,-0.32) | 0.13<br>(-0.04,0.30)    | 0.07<br>(-0.09,0.23)    | 0.17*<br>(0.00,0.34)        | -0.25*<br>(-0.42,-0.09) | -0.12<br>(-0.29,0.05)   | -0.13<br>(-0.30,0.04)   | -0.04<br>(-0.21,0.13)   | -0.23*<br>(-0.40,-0.06) |
| Missing                                          | -0.32<br>(-0.68,0.03)   | -0.53*<br>(-0.88,-0.17) | -0.11<br>(-0.47,0.25)   | -0.22<br>(-0.56,0.12)   | -0.14<br>(-0.50,0.22)       | -0.17<br>(-0.52,0.18)   | -0.46*<br>(-0.63,-0.28) | -0.37*<br>(-0.55,-0.20) | -0.36*<br>(-0.54,-0.19) | -0.49*<br>(-0.67,-0.32) |
| <i>Controls</i>                                  |                         |                         |                         |                         |                             |                         |                         |                         |                         |                         |
| Female                                           | -0.22*<br>(-0.28,-0.15) | -0.12*<br>(-0.18,-0.05) | 0.16*<br>(0.09,0.23)    | -0.60*<br>(-0.66,-0.53) | 0.04<br>(-0.03,0.11)        | 0.50*<br>(0.43,0.57)    | -0.08*<br>(-0.15,-0.02) | -0.11*<br>(-0.17,-0.04) | -0.21*<br>(-0.27,-0.14) | -0.15*<br>(-0.21,-0.08) |
| Age (in months)                                  | -0.01<br>(-0.01,0.00)   | -0.00<br>(-0.01,0.01)   | -0.00<br>(-0.01,0.01)   | -0.01<br>(-0.01,0.00)   | -0.01<br>(-0.02,0.00)       | 0.00<br>(-0.01,0.01)    | -0.00<br>(-0.01,0.01)   | 0.00<br>(-0.01,0.01)    | 0.00<br>(-0.01,0.01)    | 0.01<br>(-0.00,0.01)    |
| Language other than English                      | 0.17*<br>(0.06,0.28)    | 0.16*<br>(0.05,0.27)    | 0.11<br>(-0.00,0.22)    | 0.05<br>(-0.06,0.15)    | 0.19*<br>(0.08,0.30)        | 0.03<br>(-0.08,0.14)    | -0.34*<br>(-0.46,-0.23) | -0.47*<br>(-0.59,-0.36) | -0.04<br>(-0.15,0.08)   | -0.16*<br>(-0.28,-0.04) |
| # siblings ( <i>ref. Zero</i> )                  |                         |                         |                         |                         |                             |                         |                         |                         |                         |                         |
| One                                              | 0.15*<br>(0.04,0.26)    | 0.15*<br>(0.04,0.26)    | 0.14*<br>(0.03,0.25)    | 0.11*<br>(0.00,0.22)    | 0.07<br>(-0.04,0.18)        | -0.02<br>(-0.13,0.09)   | 0.17*<br>(0.06,0.28)    | 0.15*<br>(0.04,0.26)    | 0.08<br>(-0.03,0.19)    | 0.23*<br>(0.12,0.34)    |
| Two                                              | 0.13*<br>(0.01,0.24)    | 0.13*<br>(0.02,0.25)    | 0.07<br>(-0.05,0.19)    | 0.14*<br>(0.03,0.25)    | 0.04<br>(-0.07,0.16)        | -0.05<br>(-0.17,0.06)   | 0.21*<br>(0.10,0.33)    | 0.21*<br>(0.10,0.33)    | 0.10<br>(-0.02,0.22)    | 0.23*<br>(0.12,0.35)    |
| Three or more                                    | 0.11<br>(-0.02,0.24)    | 0.10<br>(-0.03,0.23)    | -0.04<br>(-0.18,0.10)   | 0.15*<br>(0.02,0.28)    | 0.07<br>(-0.07,0.21)        | -0.05<br>(-0.18,0.08)   | 0.23*<br>(0.09,0.36)    | 0.19*<br>(0.05,0.32)    | 0.17*<br>(0.03,0.30)    | 0.23*<br>(0.09,0.36)    |
| Mother at home                                   | 0.34*<br>(0.13,0.55)    | 0.27*<br>(0.06,0.48)    | 0.41*<br>(0.20,0.62)    | 0.08<br>(-0.12,0.28)    | 0.32*<br>(0.10,0.53)        | 0.45*<br>(0.24,0.66)    | 0.31*<br>(0.10,0.52)    | 0.21*<br>(0.00,0.42)    | 0.20<br>(-0.00,0.41)    | 0.23*<br>(0.02,0.44)    |
| Father at home                                   | 0.24*<br>(0.16,0.33)    | 0.17*<br>(0.08,0.26)    | 0.21*<br>(0.12,0.30)    | 0.12*<br>(0.04,0.21)    | 0.23*<br>(0.14,0.32)        | 0.17*<br>(0.08,0.25)    | 0.34*<br>(0.25,0.43)    | 0.26*<br>(0.17,0.34)    | 0.27*<br>(0.18,0.35)    | 0.18*<br>(0.09,0.27)    |
| <i>n</i>                                         | 3,339                   | 3,339                   | 3,340                   | 3,339                   | 3,339                       | 3,341                   | 3,368                   | 3,368                   | 3,368                   | 3,365                   |
| <i>R</i> <sup>2</sup>                            | 0.069                   | 0.059                   | 0.031                   | 0.134                   | 0.029                       | 0.073                   | 0.054                   | 0.046                   | 0.046                   | 0.041                   |

| <i>Models 11-20</i>                              | PED<br>school           | CHU9D<br>General<br>health | SMFQ<br>depression      | Smoking                 | Alcohol                 | Marijuana               | Sleep<br>quantity        | Sleep<br>quality            | IPPA<br>Support<br>parents | IPPA<br>Support<br>friends |
|--------------------------------------------------|-------------------------|----------------------------|-------------------------|-------------------------|-------------------------|-------------------------|--------------------------|-----------------------------|----------------------------|----------------------------|
| <i>Sexual attraction<br/>(ref. heterosexual)</i> |                         |                            |                         |                         |                         |                         |                          |                             |                            |                            |
| LGBQ                                             | -0.22*<br>(-0.36,-0.09) | -0.54*<br>(-0.67,-0.41)    | -0.46*<br>(-0.59,-0.33) | -0.27*<br>(-0.41,-0.14) | -0.23*<br>(-0.36,-0.09) | -0.20*<br>(-0.33,-0.06) | -0.21*<br>(-0.35,-0.07)  | -0.29*<br>(-0.43,-0.15)     | -0.43*<br>(-0.56,-0.30)    | -0.32*<br>(-0.45,-0.19)    |
| No attraction                                    | 0.03<br>(-0.14,0.20)    | 0.20*<br>(0.03,0.36)       | 0.13<br>(-0.04,0.30)    | 0.07<br>(-0.10,0.24)    | 0.26*<br>(0.09,0.43)    | 0.18*<br>(0.01,0.35)    | 0.08<br>(-0.09,0.25)     | 0.06<br>(-0.11,0.24)        | -0.03<br>(-0.20,0.14)      | -0.42*<br>(-0.58,-0.25)    |
| Missing                                          | -0.25*<br>(-0.42,-0.08) | -0.18<br>(-0.54,0.19)      | 0.04<br>(-0.33,0.40)    | -0.00<br>(-0.39,0.38)   | 0.17<br>(-0.21,0.55)    | 0.12<br>(-0.26,0.50)    | -0.08<br>(-0.36,0.19)    | -0.16<br>(-0.43,0.12)       | 0.22<br>(-0.14,0.59)       | -0.59*<br>(-0.95,-0.24)    |
| <i>Controls</i>                                  |                         |                            |                         |                         |                         |                         |                          |                             |                            |                            |
| Female                                           | 0.22*<br>(0.15,0.29)    | -0.43*<br>(-0.50,-0.36)    | -0.31*<br>(-0.38,-0.25) | -0.02<br>(-0.09,0.04)   | -0.01<br>(-0.08,0.05)   | 0.03<br>(-0.04,0.10)    | -0.28*<br>(-0.35,-0.21)  | -0.22*<br>(-0.28,-0.15)     | -0.19*<br>(-0.26,-0.13)    | 0.36*<br>(0.29,0.43)       |
| Age (in months)                                  | -0.01*<br>(-0.02,-0.00) | -0.00<br>(-0.01,0.00)      | -0.01*<br>(-0.02,-0.00) | -0.02*<br>(-0.02,-0.01) | -0.03*<br>(-0.03,-0.02) | -0.02*<br>(-0.03,-0.01) | 0.00<br>(-0.01,0.01)     | -0.00<br>(-0.01,0.01)       | -0.01<br>(-0.02,0.00)      | 0.00<br>(-0.01,0.01)       |
| Language other than<br>English                   | -0.30*<br>(-0.41,-0.18) | 0.01<br>(-0.11,0.12)       | 0.07<br>(-0.04,0.18)    | 0.08<br>(-0.04,0.19)    | 0.18*<br>(0.07,0.29)    | 0.07<br>(-0.05,0.18)    | 0.01<br>(-0.11,0.12)     | 0.00<br>(-0.11,0.12)        | -0.08<br>(-0.19,0.03)      | 0.06<br>(-0.05,0.18)       |
| # siblings ( <i>ref. Zero</i> )                  |                         |                            |                         |                         |                         |                         |                          |                             |                            |                            |
| One                                              | 0.09<br>(-0.02,0.20)    | 0.10<br>(-0.01,0.21)       | 0.13*<br>(0.02,0.24)    | 0.09<br>(-0.02,0.21)    | 0.17*<br>(0.05,0.28)    | 0.16*<br>(0.05,0.27)    | 0.04<br>(-0.07,0.15)     | 0.06<br>(-0.06,0.17)        | -0.05<br>(-0.17,0.06)      | 0.01<br>(-0.10,0.13)       |
| Two                                              | 0.12*<br>(0.01,0.24)    | 0.11<br>(-0.01,0.23)       | 0.12*<br>(0.00,0.24)    | 0.08<br>(-0.05,0.20)    | 0.19*<br>(0.07,0.31)    | 0.13*<br>(0.01,0.25)    | 0.12<br>(-0.00,0.23)     | 0.09<br>(-0.03,0.21)        | -0.16*<br>(-0.28,-0.05)    | -0.01<br>(-0.13,0.11)      |
| Three or more                                    | 0.16*<br>(0.02,0.29)    | 0.13<br>(-0.01,0.26)       | 0.14*<br>(0.01,0.28)    | 0.03<br>(-0.11,0.17)    | 0.16*<br>(0.03,0.30)    | 0.17*<br>(0.03,0.30)    | 0.01<br>(-0.12,0.15)     | 0.08<br>(-0.06,0.21)        | -0.16*<br>(-0.30,-0.02)    | 0.05<br>(-0.08,0.19)       |
| Mother at home                                   | 0.39*<br>(0.18,0.60)    | 0.22*<br>(0.01,0.43)       | 0.29*<br>(0.08,0.50)    | 0.24*<br>(0.02,0.46)    | 0.17<br>(-0.05,0.39)    | 0.46*<br>(0.24,0.67)    | -0.01<br>(-0.23,0.20)    | 0.07<br>(-0.14,0.28)        | 0.27*<br>(0.06,0.49)       | 0.14<br>(-0.07,0.35)       |
| Father at home                                   | 0.40*<br>(0.32,0.49)    | 0.09*<br>(0.01,0.18)       | 0.18*<br>(0.10,0.27)    | 0.23*<br>(0.13,0.32)    | 0.17*<br>(0.08,0.26)    | 0.24*<br>(0.15,0.33)    | 0.04<br>(-0.05,0.13)     | -0.00<br>(-0.09,0.09)       | 0.18*<br>(0.09,0.27)       | 0.16*<br>(0.07,0.25)       |
| <i>n</i>                                         | 3,367                   | 3,327                      | 3,338                   | 3,259                   | 3,281                   | 3,326                   | 3,310                    | 3,310                       | 3,338                      | 3,341                      |
| <i>R</i> <sup>2</sup>                            | 0.056                   | 0.080                      | 0.057                   | 0.022                   | 0.034                   | 0.031                   | 0.027                    | 0.020                       | 0.035                      | 0.048                      |
| <i>Models 21-30</i>                              | Self-harm<br>thoughts   | Self-harm                  | Suicide<br>thoughts     | Suicide<br>plans        | Suicide<br>attempt      | Victim                  | MSDQ<br>Self-<br>concept | PSSM<br>School<br>Belonging | General<br>health          | Life<br>satisfaction       |
| <i>Sexual attraction<br/>(ref. heterosexual)</i> |                         |                            |                         |                         |                         |                         |                          |                             |                            |                            |
| LGBQ                                             | -0.70*<br>(-0.83,-0.57) | -0.58*<br>(-0.71,-0.44)    | -0.75*<br>(-0.88,-0.61) | -0.69*<br>(-0.82,-0.55) | -0.51*<br>(-0.64,-0.38) | -0.22*<br>(-0.36,-0.09) | -0.39*<br>(-0.52,-0.25)  | -0.49*<br>(-0.63,-0.36)     | -0.33*<br>(-0.47,-0.20)    | -0.35*<br>(-0.49,-0.22)    |

|                                 |                         |                         |                         |                         |                         |                       |                         |                         |                         |                         |
|---------------------------------|-------------------------|-------------------------|-------------------------|-------------------------|-------------------------|-----------------------|-------------------------|-------------------------|-------------------------|-------------------------|
| No attraction                   | -0.02<br>(-0.19,0.14)   | 0.05<br>(-0.12,0.22)    | -0.00<br>(-0.17,0.16)   | -0.15<br>(-0.32,0.02)   | -0.03<br>(-0.20,0.14)   | 0.24*<br>(0.07,0.41)  | 0.02<br>(-0.15,0.19)    | -0.22*<br>(-0.39,-0.04) | -0.12<br>(-0.29,0.05)   | -0.06<br>(-0.23,0.11)   |
| Missing                         | -0.17<br>(-0.56,0.22)   | -0.25<br>(-0.64,0.13)   | -0.16<br>(-0.55,0.22)   | -0.10<br>(-0.48,0.29)   | -0.22<br>(-0.60,0.17)   | -0.13<br>(-0.51,0.25) | -0.31<br>(-0.67,0.05)   | -0.58*<br>(-0.95,-0.21) | -0.43*<br>(-0.70,-0.16) | -0.06<br>(-0.42,0.30)   |
| <i>Controls</i>                 |                         |                         |                         |                         |                         |                       |                         |                         |                         |                         |
| Female                          | -0.38*<br>(-0.44,-0.31) | -0.32*<br>(-0.38,-0.25) | -0.14*<br>(-0.20,-0.07) | -0.10*<br>(-0.17,-0.03) | -0.08*<br>(-0.14,-0.01) | 0.03<br>(-0.04,0.10)  | -0.14*<br>(-0.21,-0.08) | -0.07*<br>(-0.14,-0.01) | -0.19*<br>(-0.25,-0.12) | -0.11*<br>(-0.18,-0.04) |
| Age (in months)                 | -0.00<br>(-0.01,0.00)   | -0.00<br>(-0.01,0.00)   | -0.01*<br>(-0.02,-0.00) | -0.00<br>(-0.01,0.00)   | -0.00<br>(-0.01,0.01)   | -0.00<br>(-0.01,0.01) | 0.00<br>(-0.01,0.01)    | 0.00<br>(-0.01,0.01)    | -0.01<br>(-0.01,0.00)   | -0.00<br>(-0.01,0.01)   |
| Language other than English     | 0.15*<br>(0.04,0.26)    | 0.14*<br>(0.03,0.25)    | 0.05<br>(-0.06,0.16)    | 0.14*<br>(0.03,0.26)    | 0.06<br>(-0.05,0.17)    | 0.26*<br>(0.15,0.37)  | 0.04<br>(-0.07,0.15)    | 0.03<br>(-0.08,0.14)    | -0.11*<br>(-0.23,-0.00) | -0.00<br>(-0.12,0.11)   |
| # siblings ( <i>ref. Zero</i> ) |                         |                         |                         |                         |                         |                       |                         |                         |                         |                         |
| One                             | 0.14*<br>(0.03,0.25)    | 0.10<br>(-0.01,0.21)    | 0.14*<br>(0.03,0.25)    | 0.08<br>(-0.03,0.19)    | 0.02<br>(-0.10,0.13)    | 0.13*<br>(0.02,0.24)  | 0.03<br>(-0.08,0.14)    | 0.14*<br>(0.02,0.25)    | 0.09<br>(-0.03,0.20)    | 0.10<br>(-0.01,0.21)    |
| Two                             | 0.08<br>(-0.03,0.20)    | 0.04<br>(-0.08,0.16)    | 0.08<br>(-0.04,0.19)    | 0.07<br>(-0.05,0.19)    | -0.04<br>(-0.16,0.08)   | 0.11<br>(-0.00,0.23)  | 0.02<br>(-0.10,0.14)    | 0.04<br>(-0.08,0.16)    | -0.01<br>(-0.13,0.11)   | 0.01<br>(-0.11,0.13)    |
| Three or more                   | 0.13<br>(-0.00,0.26)    | 0.02<br>(-0.12,0.15)    | 0.09<br>(-0.04,0.23)    | 0.04<br>(-0.09,0.18)    | -0.01<br>(-0.15,0.13)   | 0.05<br>(-0.08,0.19)  | -0.07<br>(-0.20,0.07)   | 0.10<br>(-0.04,0.23)    | 0.06<br>(-0.07,0.20)    | -0.00<br>(-0.14,0.14)   |
| Mother at home                  | 0.25*<br>(0.04,0.46)    | 0.27*<br>(0.06,0.49)    | 0.16<br>(-0.05,0.37)    | 0.15<br>(-0.06,0.36)    | 0.35*<br>(0.13,0.56)    | 0.18<br>(-0.03,0.40)  | 0.39*<br>(0.17,0.60)    | 0.39*<br>(0.18,0.60)    | 0.10<br>(-0.12,0.31)    | 0.38*<br>(0.17,0.59)    |
| Father at home                  | 0.07<br>(-0.02,0.16)    | 0.09*<br>(0.00,0.18)    | 0.14*<br>(0.05,0.22)    | 0.14*<br>(0.05,0.23)    | 0.19*<br>(0.10,0.28)    | 0.06<br>(-0.03,0.15)  | 0.23*<br>(0.14,0.31)    | 0.24*<br>(0.15,0.33)    | 0.15*<br>(0.06,0.24)    | 0.18*<br>(0.10,0.27)    |
| <i>n</i>                        | 3,313                   | 3,315                   | 3,316                   | 3,316                   | 3,322                   | 3,336                 | 3,341                   | 3,306                   | 3,310                   | 3,340                   |
| <i>R</i> <sup>2</sup>           | 0.084                   | 0.060                   | 0.054                   | 0.043                   | 0.029                   | 0.017                 | 0.031                   | 0.040                   | 0.029                   | 0.024                   |

*Notes:* Longitudinal Study of Australian Children (Australia), K cohort, Wave 6 (2014). Standard errors in parentheses. Significance level: \*  $p < 0.05$ . LGBQ: Lesbian, Gay, Bisexual and Questioning; (R): Reverse coded; SDQ: Strengths and Difficulties Questionnaire; PedsQL: Paediatric Quality of Life Inventory; SMFQ: Short Mood and Feelings Questionnaire; IPPA: Inventory of Parent and Peer Attachment; MSDQ: Marsh Self-Description Questionnaire; PSSM: Psychological Sense of School Membership; CHU: Child Health Utility.

**Supplementary Table 2.** Logistic regression models on unstandardized binary outcomes

| Outcome               | LGBQ       |          |               | No attractions |          |               |
|-----------------------|------------|----------|---------------|----------------|----------|---------------|
|                       | Odds ratio | <i>p</i> | Adj. <i>p</i> | Odds ratio     | <i>p</i> | Adj. <i>p</i> |
| No smoking            | 0.40       | <0.01    | <0.01         | 2.02           | ns       | ns            |
| No alcohol            | 0.58       | <0.01    | <0.01         | 4.65           | <0.01    | 0.03          |
| No marijuana          | 0.57       | 0.01     | 0.01          | 8.02           | 0.04     | ns            |
| Sleeps enough         | 0.55       | <0.01    | <0.01         | 1.15           | ns       | ns            |
| Sleeps well           | 0.42       | <0.01    | <0.01         | 1.19           | ns       | ns            |
| No self-harm thoughts | 0.22       | <0.01    | <0.01         | 0.84           | ns       | ns            |
| No self-harm          | 0.24       | <0.01    | <0.01         | 1.10           | ns       | ns            |
| No suicide thoughts   | 0.19       | <0.01    | <0.01         | 0.94           | 0.05     | ns            |
| No suicide plans      | 0.19       | <0.01    | <0.01         | 0.54           | ns       | ns            |
| No suicide attempts   | 0.22       | <0.01    | <0.01         | 0.81           | ns       | ns            |
| No victimization      | 0.62       | <0.01    | <0.01         | 1.63           | 0.01     | ns            |

*Notes:* Longitudinal Study of Australian Children (Australia), K cohort, Wave 6 (2014). Each row shows the results of a separate model. All models are adjusted for the control variables (see Table 2). Adj. *p*: *p*-value adjusted for multiple comparisons using the Holm method. ns: not significant at  $\alpha=0.05$ . LGBQ: Lesbian, Gay, Bisexual and Questioning; SDQ: Strengths and Difficulties Questionnaire; PedsQL: Paediatric Quality of Life Inventory; SMFQ: Short Mood and Feelings Questionnaire; IPPA: Inventory of Parent and Peer Attachment; MSDQ: Marsh Self-Description Questionnaire; PSSM: Psychological Sense of School Membership; CHU: Child Health Utility.

**Supplementary Table 3.** Ordinary least squares regression models, full sets of estimates

| <i>Models 1-10</i>                               | SDQ<br>total<br>(R)     | SDQ<br>peer<br>(R)         | SDQ<br>conduct<br>(R)   | SDQ<br>emotional<br>(R) | SDQ<br>hyperactivity<br>(R) | SDQ<br>pro-social       | PED<br>total            | PED<br>physical         | PED<br>emotional           | PED<br>social              |
|--------------------------------------------------|-------------------------|----------------------------|-------------------------|-------------------------|-----------------------------|-------------------------|-------------------------|-------------------------|----------------------------|----------------------------|
| <i>Sexual attraction<br/>(ref. heterosexual)</i> |                         |                            |                         |                         |                             |                         |                         |                         |                            |                            |
| LGBQ                                             | -0.69*<br>(-0.82,-0.55) | -0.69*<br>(-0.82,-0.55)    | -0.34*<br>(-0.47,-0.20) | -0.62*<br>(-0.74,-0.49) | -0.39*<br>(-0.52,-0.25)     | -0.13*<br>(-0.26,-0.00) | -0.33*<br>(-0.46,-0.19) | -0.17*<br>(-0.31,-0.04) | -0.42*<br>(-0.55,-0.29)    | -0.31*<br>(-0.44,-0.18)    |
| No attraction                                    | -0.01<br>(-0.17,0.16)   | -0.49*<br>(-0.65,-0.32)    | 0.13<br>(-0.04,0.30)    | 0.07<br>(-0.09,0.23)    | 0.17*<br>(0.00,0.34)        | -0.25*<br>(-0.42,-0.09) | -0.12<br>(-0.29,0.05)   | -0.13<br>(-0.30,0.04)   | -0.04<br>(-0.21,0.13)      | -0.23*<br>(-0.40,-0.06)    |
| <i>Controls</i>                                  |                         |                            |                         |                         |                             |                         |                         |                         |                            |                            |
| Female                                           | -0.22*<br>(-0.28,-0.15) | -0.11*<br>(-0.18,-0.05)    | 0.16*<br>(0.09,0.23)    | -0.60*<br>(-0.66,-0.53) | 0.04<br>(-0.03,0.11)        | 0.50*<br>(0.43,0.56)    | -0.10*<br>(-0.16,-0.03) | -0.12*<br>(-0.19,-0.05) | -0.21*<br>(-0.28,-0.14)    | -0.16*<br>(-0.23,-0.09)    |
| Age (in months)                                  | -0.01<br>(-0.01,0.00)   | 0.00<br>(-0.01,0.01)       | -0.00<br>(-0.01,0.01)   | -0.01<br>(-0.01,0.00)   | -0.01<br>(-0.02,0.00)       | 0.00<br>(-0.01,0.01)    | -0.00<br>(-0.01,0.01)   | 0.00<br>(-0.01,0.01)    | 0.00<br>(-0.01,0.01)       | 0.01<br>(-0.00,0.01)       |
| Language other than English                      | 0.19*<br>(0.08,0.30)    | 0.18*<br>(0.07,0.29)       | 0.13*<br>(0.01,0.24)    | 0.06<br>(-0.05,0.16)    | 0.20*<br>(0.09,0.32)        | 0.03<br>(-0.08,0.14)    | -0.34*<br>(-0.45,-0.22) | -0.47*<br>(-0.59,-0.35) | -0.04<br>(-0.16,0.07)      | -0.15*<br>(-0.26,-0.03)    |
| # siblings ( <i>ref. Zero</i> )                  |                         |                            |                         |                         |                             |                         |                         |                         |                            |                            |
| One                                              | 0.14*<br>(0.03,0.25)    | 0.15*<br>(0.04,0.26)       | 0.13*<br>(0.01,0.24)    | 0.11<br>(-0.00,0.21)    | 0.07<br>(-0.04,0.18)        | -0.01<br>(-0.12,0.10)   | 0.17*<br>(0.06,0.28)    | 0.15*<br>(0.03,0.26)    | 0.10<br>(-0.01,0.21)       | 0.21*<br>(0.10,0.32)       |
| Two                                              | 0.13*<br>(0.01,0.24)    | 0.14*<br>(0.02,0.26)       | 0.05<br>(-0.06,0.17)    | 0.13*<br>(0.02,0.25)    | 0.04<br>(-0.08,0.16)        | -0.05<br>(-0.17,0.06)   | 0.20*<br>(0.09,0.32)    | 0.20*<br>(0.08,0.32)    | 0.11<br>(-0.01,0.22)       | 0.21*<br>(0.09,0.32)       |
| Three or more                                    | 0.09<br>(-0.04,0.23)    | 0.09<br>(-0.05,0.22)       | -0.05<br>(-0.19,0.08)   | 0.14*<br>(0.01,0.27)    | 0.06<br>(-0.08,0.20)        | -0.05<br>(-0.18,0.08)   | 0.23*<br>(0.09,0.36)    | 0.18*<br>(0.05,0.32)    | 0.18*<br>(0.05,0.32)       | 0.20*<br>(0.07,0.34)       |
| Mother at home                                   | 0.34*<br>(0.13,0.55)    | 0.26*<br>(0.04,0.47)       | 0.42*<br>(0.21,0.64)    | 0.09<br>(-0.11,0.29)    | 0.31*<br>(0.10,0.53)        | 0.45*<br>(0.24,0.66)    | 0.32*<br>(0.10,0.53)    | 0.20<br>(-0.02,0.42)    | 0.23*<br>(0.02,0.45)       | 0.25*<br>(0.03,0.46)       |
| Father at home                                   | 0.25*<br>(0.16,0.33)    | 0.17*<br>(0.08,0.26)       | 0.21*<br>(0.12,0.30)    | 0.12*<br>(0.04,0.21)    | 0.23*<br>(0.14,0.32)        | 0.17*<br>(0.09,0.26)    | 0.34*<br>(0.26,0.43)    | 0.26*<br>(0.17,0.35)    | 0.26*<br>(0.17,0.35)       | 0.19*<br>(0.10,0.28)       |
| <i>n</i>                                         | 3,310                   | 3,310                      | 3,311                   | 3,310                   | 3,310                       | 3,312                   | 3,240                   | 3,240                   | 3,240                      | 3,237                      |
| <i>R</i> <sup>2</sup>                            | 0.070                   | 0.058                      | 0.032                   | 0.134                   | 0.030                       | 0.072                   | 0.048                   | 0.041                   | 0.043                      | 0.034                      |
| <i>Models 11-20</i>                              | PED<br>school           | CHU9D<br>General<br>health | SMFQ<br>depression      | Smoking                 | Alcohol                     | Marijuana               | Sleep<br>quantity       | Sleep<br>quality        | IPPA<br>Support<br>parents | IPPA<br>Support<br>friends |
| <i>Sexual attraction<br/>(ref. heterosexual)</i> |                         |                            |                         |                         |                             |                         |                         |                         |                            |                            |
| LGBQ                                             | -0.22*                  | -0.54*                     | -0.46*                  | -0.27*                  | -0.23*                      | -0.20*                  | -0.21*                  | -0.29*                  | -0.43*                     | -0.32*                     |

|                                              |                                       |                                       |                                       |                                       |                                       |                                       |                                       |                                       |                                        |                                          |
|----------------------------------------------|---------------------------------------|---------------------------------------|---------------------------------------|---------------------------------------|---------------------------------------|---------------------------------------|---------------------------------------|---------------------------------------|----------------------------------------|------------------------------------------|
| No attraction                                | (-0.35,-0.09)<br>0.03<br>(-0.13,0.20) | (-0.67,-0.41)<br>0.20*<br>(0.03,0.36) | (-0.59,-0.33)<br>0.13<br>(-0.04,0.30) | (-0.41,-0.14)<br>0.07<br>(-0.10,0.24) | (-0.36,-0.09)<br>0.26*<br>(0.09,0.43) | (-0.33,-0.06)<br>0.18*<br>(0.01,0.35) | (-0.34,-0.07)<br>0.08<br>(-0.09,0.25) | (-0.43,-0.15)<br>0.06<br>(-0.11,0.24) | (-0.56,-0.30)<br>-0.03<br>(-0.20,0.14) | (-0.45,-0.19)<br>-0.41*<br>(-0.58,-0.25) |
| <i>Controls</i>                              |                                       |                                       |                                       |                                       |                                       |                                       |                                       |                                       |                                        |                                          |
| Female                                       | 0.21*<br>(0.14,0.28)                  | -0.44*<br>(-0.50,-0.37)               | -0.31*<br>(-0.38,-0.25)               | -0.02<br>(-0.09,0.05)                 | -0.01<br>(-0.08,0.06)                 | 0.03<br>(-0.04,0.10)                  | -0.29*<br>(-0.36,-0.22)               | -0.23*<br>(-0.29,-0.16)               | -0.19*<br>(-0.26,-0.13)                | 0.36*<br>(0.29,0.43)                     |
| Age (in months)                              | -0.01*<br>(-0.02,-0.00)               | -0.00<br>(-0.01,0.00)                 | -0.01*<br>(-0.02,-0.00)               | -0.02*<br>(-0.02,-0.01)               | -0.03*<br>(-0.03,-0.02)               | -0.02*<br>(-0.03,-0.01)               | 0.00<br>(-0.01,0.01)                  | -0.00<br>(-0.01,0.01)                 | -0.01<br>(-0.02,0.00)                  | 0.00<br>(-0.01,0.01)                     |
| Language other than English                  | -0.29*<br>(-0.41,-0.17)               | 0.02<br>(-0.10,0.13)                  | 0.09<br>(-0.02,0.20)                  | 0.08<br>(-0.04,0.19)                  | 0.18*<br>(0.06,0.29)                  | 0.06<br>(-0.05,0.18)                  | 0.02<br>(-0.09,0.14)                  | 0.01<br>(-0.11,0.12)                  | -0.07<br>(-0.18,0.05)                  | 0.07<br>(-0.04,0.18)                     |
| # siblings (ref. Zero)                       |                                       |                                       |                                       |                                       |                                       |                                       |                                       |                                       |                                        |                                          |
| One                                          | 0.09<br>(-0.02,0.20)                  | 0.10<br>(-0.01,0.21)                  | 0.13*<br>(0.02,0.24)                  | 0.09<br>(-0.02,0.21)                  | 0.16*<br>(0.05,0.28)                  | 0.15*<br>(0.04,0.26)                  | 0.03<br>(-0.08,0.15)                  | 0.03<br>(-0.08,0.15)                  | -0.05<br>(-0.17,0.06)                  | 0.01<br>(-0.10,0.12)                     |
| Two                                          | 0.12*<br>(0.00,0.24)                  | 0.12*<br>(0.00,0.23)                  | 0.12*<br>(0.01,0.24)                  | 0.08<br>(-0.04,0.20)                  | 0.19*<br>(0.07,0.31)                  | 0.12<br>(-0.00,0.24)                  | 0.11<br>(-0.01,0.23)                  | 0.06<br>(-0.06,0.18)                  | -0.16*<br>(-0.28,-0.05)                | -0.01<br>(-0.13,0.11)                    |
| Three or more                                | 0.16*<br>(0.03,0.30)                  | 0.14*<br>(0.00,0.27)                  | 0.15*<br>(0.02,0.29)                  | 0.03<br>(-0.11,0.17)                  | 0.16*<br>(0.02,0.30)                  | 0.16*<br>(0.02,0.29)                  | -0.00<br>(-0.14,0.14)                 | 0.05<br>(-0.09,0.19)                  | -0.16*<br>(-0.29,-0.02)                | 0.04<br>(-0.10,0.17)                     |
| Mother at home                               | 0.39*<br>(0.17,0.60)                  | 0.24*<br>(0.03,0.44)                  | 0.30*<br>(0.09,0.52)                  | 0.25*<br>(0.02,0.47)                  | 0.17<br>(-0.05,0.39)                  | 0.47*<br>(0.25,0.68)                  | 0.01<br>(-0.21,0.22)                  | 0.05<br>(-0.16,0.27)                  | 0.28*<br>(0.07,0.50)                   | 0.16<br>(-0.05,0.37)                     |
| Father at home                               | 0.43*<br>(0.34,0.52)                  | 0.09*<br>(0.01,0.18)                  | 0.18*<br>(0.09,0.27)                  | 0.22*<br>(0.13,0.31)                  | 0.17*<br>(0.08,0.26)                  | 0.25*<br>(0.16,0.34)                  | 0.04<br>(-0.05,0.13)                  | -0.01<br>(-0.10,0.08)                 | 0.18*<br>(0.09,0.27)                   | 0.16*<br>(0.07,0.25)                     |
| <i>n</i>                                     | 3,239                                 | 3,300                                 | 3,310                                 | 3,233                                 | 3,255                                 | 3,300                                 | 3,259                                 | 3,259                                 | 3,310                                  | 3,312                                    |
| <i>R</i> <sup>2</sup>                        | 0.056                                 | 0.081                                 | 0.058                                 | 0.022                                 | 0.034                                 | 0.031                                 | 0.028                                 | 0.021                                 | 0.034                                  | 0.046                                    |
| <i>Models 21-30</i>                          |                                       |                                       |                                       |                                       |                                       |                                       |                                       |                                       |                                        |                                          |
|                                              | Self-harm thoughts                    | Self-harm                             | Suicide thoughts                      | Suicide plans                         | Suicide attempt                       | Victim                                | MSDQ Self-concept                     | PSSM School Belonging                 | General health                         | Life satisfaction                        |
| <i>Sexual attraction (ref. heterosexual)</i> |                                       |                                       |                                       |                                       |                                       |                                       |                                       |                                       |                                        |                                          |
| LGBQ                                         | -0.70*<br>(-0.83,-0.57)               | -0.58*<br>(-0.71,-0.44)               | -0.75*<br>(-0.88,-0.61)               | -0.69*<br>(-0.82,-0.55)               | -0.51*<br>(-0.64,-0.38)               | -0.22*<br>(-0.36,-0.09)               | -0.39*<br>(-0.52,-0.25)               | -0.50*<br>(-0.63,-0.36)               | -0.33*<br>(-0.46,-0.19)                | -0.35*<br>(-0.49,-0.22)                  |
| No attraction                                | -0.02<br>(-0.19,0.14)                 | 0.05<br>(-0.12,0.22)                  | -0.01<br>(-0.17,0.16)                 | -0.15<br>(-0.32,0.02)                 | -0.03<br>(-0.20,0.14)                 | 0.24*<br>(0.07,0.41)                  | 0.02<br>(-0.15,0.19)                  | -0.21*<br>(-0.38,-0.04)               | -0.11<br>(-0.28,0.06)                  | -0.06<br>(-0.23,0.11)                    |
| <i>Controls</i>                              |                                       |                                       |                                       |                                       |                                       |                                       |                                       |                                       |                                        |                                          |
| Female                                       | -0.38*<br>(-0.45,-0.31)               | -0.32*<br>(-0.38,-0.25)               | -0.14*<br>(-0.20,-0.07)               | -0.10*<br>(-0.17,-0.03)               | -0.08*<br>(-0.15,-0.01)               | 0.03<br>(-0.04,0.10)                  | -0.14*<br>(-0.21,-0.08)               | -0.07<br>(-0.13,0.00)                 | -0.19*<br>(-0.26,-0.12)                | -0.11*<br>(-0.18,-0.04)                  |
| Age (in months)                              | -0.00<br>(-0.01,0.00)                 | -0.00<br>(-0.01,0.00)                 | -0.01*<br>(-0.02,-0.00)               | -0.00<br>(-0.01,0.00)                 | -0.00<br>(-0.01,0.01)                 | -0.00<br>(-0.01,0.01)                 | 0.00<br>(-0.01,0.01)                  | 0.00<br>(-0.01,0.01)                  | -0.01<br>(-0.01,0.00)                  | -0.00<br>(-0.01,0.01)                    |
| Language other than                          | 0.16*<br>(0.03,0.30)                  | 0.16*<br>(0.00,0.27)                  | 0.06<br>(0.02,0.29)                   | 0.14*<br>(-0.11,0.17)                 | 0.05<br>(-0.05,0.39)                  | 0.28*<br>(0.25,0.68)                  | 0.04<br>(-0.21,0.22)                  | 0.04<br>(-0.16,0.27)                  | -0.11<br>(0.07,0.50)                   | 0.00<br>(-0.05,0.37)                     |



|                                 |              |              |              |              |              |              |              |              |              |              |
|---------------------------------|--------------|--------------|--------------|--------------|--------------|--------------|--------------|--------------|--------------|--------------|
| English                         |              |              |              |              |              |              |              |              |              |              |
|                                 | (0.05,0.27)  | (0.04,0.27)  | (-0.06,0.17) | (0.03,0.26)  | (-0.06,0.17) | (0.16,0.39)  | (-0.07,0.16) | (-0.07,0.16) | (-0.23,0.00) | (-0.11,0.12) |
| # siblings ( <i>ref. Zero</i> ) |              |              |              |              |              |              |              |              |              |              |
| One                             | 0.14*        | 0.10         | 0.15*        | 0.09         | 0.02         | 0.14*        | 0.03         | 0.12*        | 0.09         | 0.09         |
|                                 | (0.03,0.25)  | (-0.01,0.21) | (0.03,0.26)  | (-0.03,0.20) | (-0.09,0.13) | (0.02,0.25)  | (-0.08,0.14) | (0.00,0.23)  | (-0.03,0.20) | (-0.02,0.21) |
| Two                             | 0.09         | 0.05         | 0.09         | 0.08         | -0.03        | 0.12*        | 0.02         | 0.02         | -0.01        | 0.00         |
|                                 | (-0.03,0.21) | (-0.07,0.16) | (-0.03,0.20) | (-0.04,0.20) | (-0.15,0.09) | (0.00,0.24)  | (-0.10,0.14) | (-0.09,0.14) | (-0.13,0.11) | (-0.12,0.12) |
| Three or more                   | 0.14*        | 0.03         | 0.10         | 0.05         | -0.01        | 0.06         | -0.06        | 0.07         | 0.08         | -0.01        |
|                                 | (0.01,0.27)  | (-0.10,0.17) | (-0.04,0.23) | (-0.09,0.18) | (-0.15,0.12) | (-0.08,0.20) | (-0.20,0.08) | (-0.06,0.21) | (-0.06,0.22) | (-0.14,0.13) |
| Mother at home                  | 0.26*        | 0.28*        | 0.17         | 0.15         | 0.36*        | 0.20         | 0.39*        | 0.32*        | 0.10         | 0.39*        |
|                                 | (0.05,0.47)  | (0.07,0.50)  | (-0.05,0.38) | (-0.06,0.37) | (0.14,0.57)  | (-0.02,0.41) | (0.18,0.61)  | (0.11,0.53)  | (-0.11,0.32) | (0.17,0.60)  |
| Father at home                  | 0.06         | 0.09         | 0.13*        | 0.13*        | 0.18*        | 0.05         | 0.22*        | 0.25*        | 0.16*        | 0.18*        |
|                                 | (-0.02,0.15) | (-0.00,0.18) | (0.05,0.22)  | (0.04,0.22)  | (0.09,0.27)  | (-0.04,0.14) | (0.13,0.31)  | (0.16,0.33)  | (0.07,0.25)  | (0.09,0.27)  |
| <i>n</i>                        | 3,289        | 3,290        | 3,291        | 3,291        | 3,297        | 3,309        | 3,312        | 3,278        | 3,259        | 3,311        |
| R <sup>2</sup>                  | 0.085        | 0.061        | 0.055        | 0.043        | 0.029        | 0.018        | 0.030        | 0.036        | 0.027        | 0.024        |

Notes: Longitudinal Study of Australian Children (Australia), K cohort, Wave 6 (2014). Standard errors in parentheses. Significance level: \*  $p < 0.05$ . LGBQ: Lesbian, Gay, Bisexual and Questioning; (R): Reverse coded; SDQ: Strengths and Difficulties Questionnaire; PedsQL: Paediatric Quality of Life Inventory; SMFQ: Short Mood and Feelings Questionnaire; IPPA: Inventory of Parent and Peer Attachment; MSDQ: Marsh Self-Description Questionnaire; PSSM: Psychological Sense of School Membership; CHU: Child Health Utility.

**Supplementary Table 4.** Ordinary least squares regression models, sex × sexual attraction interactions

| <i>Models 1-10</i>                               | SDQ<br>total<br>(R)     | SDQ<br>peer<br>(R)         | SDQ<br>conduct<br>(R)                | SDQ<br>emotional<br>(R)              | SDQ<br>hyperactivit<br>y<br>(R) | SDQ<br>pro-social       | PED<br>total            | PED<br>physical         | PED<br>emotional           | PED<br>social              |
|--------------------------------------------------|-------------------------|----------------------------|--------------------------------------|--------------------------------------|---------------------------------|-------------------------|-------------------------|-------------------------|----------------------------|----------------------------|
| <i>Sexual attraction<br/>(ref. heterosexual)</i> |                         |                            |                                      |                                      |                                 |                         |                         |                         |                            |                            |
| LGBQ                                             | -0.59*<br>(-0.83,-0.36) | -0.63*<br>(-0.86,-0.40)    | -0.13<br>(-0.37,0.10)                | -0.72*<br>(-0.94,-0.49)              | -0.22<br>(-0.46,0.01)           | -0.03<br>(-0.26,0.21)   | -0.25*<br>(-0.48,-0.01) | -0.15<br>(-0.38,0.09)   | -0.40*<br>(-0.64,-0.17)    | -0.16<br>(-0.40,0.07)      |
| No attraction                                    | -0.18<br>(-0.43,0.07)   | -0.56*<br>(-0.81,-0.30)    | 0.03<br>(-0.23,0.29)                 | -0.22<br>(-0.47,0.02)                | 0.16<br>(-0.10,0.41)            | -0.29*<br>(-0.54,-0.04) | -0.18<br>(-0.43,0.08)   | -0.20<br>(-0.46,0.06)   | 0.07<br>(-0.19,0.33)       | -0.41*<br>(-0.66,-0.15)    |
| <i>Sex</i>                                       |                         |                            |                                      |                                      |                                 |                         |                         |                         |                            |                            |
| Female                                           | -0.22*<br>(-0.29,-0.15) | -0.11*<br>(-0.18,-0.04)    | 0.17*<br>(0.10,0.24)                 | -0.63*<br>(-0.70,-0.56)              | 0.06<br>(-0.02,0.13)            | 0.50*<br>(0.43,0.57)    | -0.09*<br>(-0.16,-0.02) | -0.12*<br>(-0.19,-0.05) | -0.20*<br>(-0.27,-0.13)    | -0.16*<br>(-0.23,-0.09)    |
| <i>Sex × sexual attraction</i>                   |                         |                            |                                      |                                      |                                 |                         |                         |                         |                            |                            |
| LGBQ * female                                    | -0.13<br>(-0.41,0.15)   | -0.08<br>(-0.36,0.21)      | -0.29* <sup>a</sup><br>(-0.58,-0.00) | 0.16<br>(-0.12,0.43)                 | -0.24<br>(-0.53,0.05)           | -0.15<br>(-0.43,0.13)   | -0.12<br>(-0.40,0.17)   | -0.04<br>(-0.32,0.25)   | -0.02<br>(-0.31,0.26)      | -0.21<br>(-0.49,0.07)      |
| No attractions * female                          | 0.30<br>(-0.03,0.64)    | 0.12<br>(-0.21,0.46)       | 0.17<br>(-0.17,0.51)                 | 0.52*<br>(0.20,0.85)                 | 0.03<br>(-0.31,0.37)            | 0.07<br>(-0.27,0.40)    | 0.10<br>(-0.24,0.44)    | 0.12<br>(-0.22,0.46)    | -0.20<br>(-0.54,0.15)      | 0.32<br>(-0.02,0.66)       |
| <i>Controls</i>                                  |                         |                            |                                      |                                      |                                 |                         |                         |                         |                            |                            |
|                                                  | Yes                     | Yes                        | Yes                                  | Yes                                  | Yes                             | Yes                     | Yes                     | Yes                     | Yes                        | Yes                        |
| <i>n</i>                                         | 3,310                   | 3,310                      | 3,311                                | 3,310                                | 3,310                           | 3,312                   | 3,240                   | 3,240                   | 3,240                      | 3,237                      |
| <i>R</i> <sup>2</sup>                            | 0.071                   | 0.059                      | 0.034                                | 0.137                                | 0.031                           | 0.073                   | 0.049                   | 0.042                   | 0.043                      | 0.035                      |
| <i>Models 11-20</i>                              | PED<br>school           | CHU9D<br>General<br>health | SMFQ<br>depression                   | Smoking                              | Alcohol                         | Marijuana               | Sleep<br>quantity       | Sleep<br>quality        | IPPA<br>Support<br>parents | IPPA<br>Support<br>friends |
| <i>Sexual attraction<br/>(ref. heterosexual)</i> |                         |                            |                                      |                                      |                                 |                         |                         |                         |                            |                            |
| LGBQ                                             | -0.12<br>(-0.35,0.11)   | -0.53*<br>(-0.76,-0.30)    | -0.40*<br>(-0.63,-0.16)              | 0.04<br>(-0.21,0.29)                 | -0.04<br>(-0.28,0.20)           | -0.22<br>(-0.46,0.02)   | -0.13<br>(-0.37,0.11)   | -0.36*<br>(-0.61,-0.12) | -0.43*<br>(-0.66,-0.19)    | -0.32*<br>(-0.56,-0.09)    |
| No attraction                                    | 0.01<br>(-0.25,0.26)    | -0.01<br>(-0.26,0.25)      | -0.10<br>(-0.36,0.15)                | 0.05<br>(-0.21,0.31)                 | 0.19<br>(-0.07,0.44)            | 0.15<br>(-0.11,0.41)    | 0.10<br>(-0.16,0.35)    | 0.01<br>(-0.25,0.27)    | -0.35*<br>(-0.61,-0.09)    | -0.53*<br>(-0.79,-0.28)    |
| <i>Sex</i>                                       |                         |                            |                                      |                                      |                                 |                         |                         |                         |                            |                            |
| Female                                           | 0.22*<br>(0.15,0.29)    | -0.45*<br>(-0.52,-0.38)    | -0.33*<br>(-0.40,-0.25)              | 0.00<br>(-0.07,0.07)                 | -0.00<br>(-0.07,0.07)           | 0.03<br>(-0.05,0.10)    | -0.28*<br>(-0.35,-0.21) | -0.24*<br>(-0.31,-0.16) | -0.22*<br>(-0.29,-0.15)    | 0.35*<br>(0.28,0.42)       |
| <i>Sex × sexual attraction</i>                   |                         |                            |                                      |                                      |                                 |                         |                         |                         |                            |                            |
| LGBQ * female                                    | -0.14<br>(-0.43,0.14)   | -0.01<br>(-0.29,0.27)      | -0.08<br>(-0.37,0.20)                | -0.45* <sup>a</sup><br>(-0.75,-0.16) | -0.27<br>(-0.56,0.02)           | 0.03<br>(-0.26,0.32)    | -0.11<br>(-0.40,0.18)   | 0.11<br>(-0.18,0.40)    | 0.01<br>(-0.28,0.29)       | 0.00<br>(-0.28,0.29)       |
| No attractions * female                          | 0.05                    | 0.36*<br>(0.05,0.67)       | 0.42*<br>(0.13,0.71)                 | 0.03                                 | 0.13                            | 0.06                    | -0.03                   | 0.10                    | 0.57*<br>(0.28,0.86)       | 0.21                       |

|                                              |                    |                     |                  |               |                     |               |                   |                       |                |                   |
|----------------------------------------------|--------------------|---------------------|------------------|---------------|---------------------|---------------|-------------------|-----------------------|----------------|-------------------|
|                                              | (-0.29,0.39)       | (0.02,0.69)         | (0.08,0.75)      | (-0.31,0.38)  | (-0.21,0.47)        | (-0.28,0.40)  | (-0.38,0.31)      | (-0.24,0.44)          | (0.22,0.91)    | (-0.13,0.55)      |
| <i>Controls</i>                              | Yes                | Yes                 | Yes              | Yes           | Yes                 | Yes           | Yes               | Yes                   | Yes            | Yes               |
| <i>n</i>                                     | 3,239              | 3,300               | 3,310            | 3,233         | 3,255               | 3,300         | 3,259             | 3,259                 | 3,310          | 3,312             |
| <i>R</i> <sup>2</sup>                        | 0.056              | 0.083               | 0.060            | 0.025         | 0.035               | 0.031         | 0.029             | 0.021                 | 0.037          | 0.047             |
| <i>Models 21-30</i>                          | Self-harm thoughts | Self-harm           | Suicide thoughts | Suicide plans | Suicide attempt     | Victim        | MSDQ Self-concept | PSSM School Belonging | General health | Life satisfaction |
| <i>Sexual attraction (ref. heterosexual)</i> |                    |                     |                  |               |                     |               |                   |                       |                |                   |
| LGBQ                                         | -0.53*             | -0.37*              | -0.64*           | -0.62*        | -0.23               | -0.27*        | -0.21             | -0.34*                | -0.41*         | -0.22             |
|                                              | (-0.76,-0.30)      | (-0.60,-0.14)       | (-0.87,-0.40)    | (-0.86,-0.39) | (-0.46,0.01)        | (-0.51,-0.03) | (-0.45,0.03)      | (-0.58,-0.10)         | (-0.65,-0.17)  | (-0.46,0.02)      |
| No attraction                                | -0.24              | -0.07               | -0.10            | -0.19         | -0.23               | 0.16          | -0.33*            | -0.44*                | -0.40*         | -0.31*            |
|                                              | (-0.49,0.01)       | (-0.33,0.18)        | (-0.35,0.15)     | (-0.45,0.06)  | (-0.49,0.03)        | (-0.10,0.42)  | (-0.58,-0.07)     | (-0.70,-0.19)         | (-0.66,-0.14)  | (-0.57,-0.05)     |
| <i>Sex</i>                                   |                    |                     |                  |               |                     |               |                   |                       |                |                   |
| Female                                       | -0.38*             | -0.31*              | -0.13*           | -0.10*        | -0.07               | 0.02          | -0.15*            | -0.07                 | -0.22*         | -0.12*            |
|                                              | (-0.45,-0.31)      | (-0.38,-0.24)       | (-0.21,-0.06)    | (-0.17,-0.03) | (-0.14,0.00)        | (-0.05,0.09)  | (-0.23,-0.08)     | (-0.14,0.00)          | (-0.29,-0.15)  | (-0.19,-0.04)     |
| <i>Sex × sexual attraction</i>               |                    |                     |                  |               |                     |               |                   |                       |                |                   |
| LGBQ × female                                | -0.24              | -0.30* <sup>a</sup> | -0.15            | -0.09         | -0.41* <sup>a</sup> | 0.07          | -0.25             | -0.22                 | 0.13           | -0.18             |
|                                              | (-0.52,0.04)       | (-0.58,-0.01)       | (-0.44,0.13)     | (-0.38,0.19)  | (-0.69,-0.12)       | (-0.22,0.36)  | (-0.54,0.04)      | (-0.51,0.06)          | (-0.17,0.42)   | (-0.47,0.10)      |
| No attractions × female                      | 0.38*              | 0.22                | 0.17             | 0.08          | 0.35*               | 0.14          | 0.61*             | 0.41*                 | 0.51*          | 0.43*             |
|                                              | (0.05,0.71)        | (-0.12,0.55)        | (-0.17,0.50)     | (-0.26,0.42)  | (0.00,0.69)         | (-0.21,0.48)  | (0.27,0.95)       | (0.07,0.75)           | (0.16,0.85)    | (0.09,0.78)       |
| <i>Controls</i>                              | Yes                | Yes                 | Yes              | Yes           | Yes                 | Yes           | Yes               | Yes                   | Yes            | Yes               |
| <i>n</i>                                     | 3,289              | 3,290               | 3,291            | 3,291         | 3,297               | 3,309         | 3,312             | 3,278                 | 3,259          | 3,311             |
| <i>R</i> <sup>2</sup>                        | 0.087              | 0.062               | 0.055            | 0.043         | 0.033               | 0.018         | 0.034             | 0.038                 | 0.030          | 0.027             |

*Notes:* Longitudinal Study of Australian Children (Australia), K cohort, Wave 6 (2014). Standard errors in parentheses. Significance level: \*  $p < 0.05$ . Controls as in Table 2. LGBQ: Lesbian, Gay, Bisexual and Questioning; (R): Reverse coded; SDQ: Strengths and Difficulties Questionnaire; PedsQL: Paediatric Quality of Life Inventory; SMFQ: Short Mood and Feelings Questionnaire; IPPA: Inventory of Parent and Peer Attachment; MSDQ: Marsh Self-Description Questionnaire; PSSM: Psychological Sense of School Membership; CHU: Child Health Utility. <sup>a</sup> *LGBQ × female* coefficient not statistically significant ( $p \geq 0.05$ ) after adjustments for multiple comparisons using the Holm-Sidak method.
